# Supplementary material for: Gastrointestinal mucosal damage in patients with COVID-19 undergoing endoscopy: an international multicentre study
Source: PubMed Central journal article supplement — BMJ Open Gastroenterol. 2021 Feb 24;8(1):e000578. doi: 10.1136/bmjgast-2020-000578 (PMC7907837; doi:10.1136/bmjgast-2020-000578), 2021-02-24
Supplement: bmjgast-2020-000578supp001.pdf [file bmjgast-2020-000578supp001.pdf]

## Gastrointestinal mucosal damage in COVID-19 patients undergoing endoscopy: an international multicentre study.

**Supplementary Table 1:** Centres and Relative Case contributions

| Centre                                                                                                           | Number of included cases |
|------------------------------------------------------------------------------------------------------------------|--------------------------|
| ASST Papa Giovanni XXIII, Bergamo, Italy                                                                         | 18                       |
| IRCCS San Raffaele Scientific Institute, Vita-Salute San Raffaele University, Milan, Italy.                      | 14                       |
| University of Bologna and Sant'Orsola Malpighi Hospital, Bologna, Italy                                          | 12                       |
| Hospital Casa de Saude de Santos. Santos. Brazil.                                                                | 11                       |
| Fondazione Policlinico Universitario Agostino Gemelli IRCCS, Università Cattolica del Sacro Cuore, Rome, Italy   | 10                       |
| University Hospitals Leuven, Belgium                                                                             | 9                        |
| Yale University School of Medicine, New Haven, CT, USA                                                           | 9                        |
| Robert Wood Johnson Medical School Rutgers University, New Brunswick, United States                              | 7                        |
| Sant'Andrea Hospital, Sapienza University of Rome, Italy                                                         | 6                        |
| San Matteo Hospital Foundation, University of Pavia, Italy                                                       | 3                        |
| University of Padua, Italy                                                                                       | 3                        |
| Newcastle upon Tyne hospitals NHS Trust, United Kingdom                                                          | 3                        |
| University Hospital of Santiago de Compostela. Health Research Institute of Santiago de Compostela (IDIS), Spain | 3                        |
| Imeldaziekenhuis, Bonheiden, Belgium                                                                             | 3                        |
| National and Kapodistrian University of Athens, "Attikon" University General Hospital, Athens, Greece            | 2                        |
| Ospedale Sandro Pertini, Rome, Italy                                                                             | 1                        |

### Supplementary Statement 1: Inclusion and Exclusion criteria

Inclusion criteria were:

1. Patients  $\geq$  18 years old
2. SARS-CoV-2 infection confirmed by real-time reverse-transcriptase polymerase chain reaction (PCR) identification of RNA according to WHO-approved methods<sup>1</sup>
3. Patients undergoing an endoscopy examination allowing direct visualization of upper or lower GI tract, including endoscopic ultrasound (EUS) and Endoscopic Retrograde Cholangio-Pancreatography (ERCP) when the endoscopist could reasonably exclude upper GI damage.

Exclusion criteria were:

1. Unclear infection status
2. Endoscopic examinations executed before COVID-19 clinical onset or positive detection test
3. Negative SARS-CoV-2 detection test at the time of endoscopic examination following a previously documented infection (i.e. recovery with viral elimination).

## Supplementary Figure 1: Case Report Form

Endoscopic findings in patients with SARS-CoV-2 infection Center

**Patient** Age   M  F

---

**Before admission** Chronic Diseases   
 Relevant Chronic Therapy   
 Pre-admission ASA score   Antiplatelet  Anticoagulant (please specify)

---

**Reason for admission**  COVID related  Other  Date of admission \_\_\_/\_\_\_/\_\_\_  
 Outpatient

**SARS-CoV-2 infection Status:**  
 Date of clinical onset \_\_\_/\_\_\_/\_\_\_ Date of +ve test \_\_\_/\_\_\_/\_\_\_ Date of eventual negative test \_\_\_/\_\_\_/\_\_\_  
 Asymptomatic  Pulmonary Disease (COVID)  GI symptoms during COVID  
 sub-intensive care  intensive care (with invasive ventilation)  none  nausea  vomit  
 diarrhea  abdominal pain  anorexia

Active treatment for COVID (e.g. biologic therapy, Ig):   
 Any other treatment during admission:   antibiotics  antifungal  antiviral  glucocorticoids

---

**Exam:** Urgent  Reason for the exam  Date of exam \_\_\_/\_\_\_/\_\_\_  
 Biochemistry (within 48 hours before procedure) Platelet count \_\_\_ x 10<sup>3</sup>/L D-Dimers \_\_\_  $\mu$ g/mL DDU =  $\mu$ g/mL FEU  
 Examination: Upper endoscopy  Colonoscopy  ERCP  EUS  Other

**Final diagnosis:**

---

**Upper GI tract**  normal

**Mucosal Findings**  erythematous  edematous  granular/nodular  friable  petechial/hemorrhagic  
 atrophic  sclerosis/scarring  candidosis/candidiasis  ulcerated  
 Location:  diffuse  patchy  localised \_\_\_\_\_  
 Severity:  mild  moderate  severe

**Focal abnormalities**  Esophagitis [Los Angeles Classification:  A  B  C  D]  
 Please specify for any focal abnormality  Barrett Esophagus [Prague Classification: C \_\_\_ / M \_\_\_]  
 Varices [Esophageal  F1  F2  F2 Gastric  GOV1  GOV2  IG1  IG2  
 Red color signs:  No  red wale  cherry red spot  hematocyst  white nipple]  
 Quantity: N \_\_\_\_\_  
 Location: \_\_\_\_\_  
 Vascular lesions  Angiectasia  Dieulafoy  
 Lesions / Polyps Size (mm) \_\_\_\_\_  
 Paris:  Ip  Sp  Is  Ia  Ib  Ic  III Any specification \_\_\_\_\_  
 Aspect:  malignant  adenomatous  hyperplastic  inflammatory  pseudopolyp  
 other (fundic gland polyps, neuroendocrine, condylomas etc.) \_\_\_\_\_  
 Erosions / Ulcers Size (mm) \_\_\_\_\_  Mallory-Weiss tears  
 Depth:  superficial  cratered  
 Shape:  round  linear  irregular

Thickened gastric folds  Scalloping (small intestine)  Enlarged Brunners glands  Schatzki ring

---

**Lower GI tract**  normal  ileum explored (Please indicate if any difference is found between ileum and colon)

**Mucosal Findings**  erythematous  edematous  granular/nodular  friable  petechial/hemorrhagic  
 atrophic  sclerosis/scarring  melanotic  ulcerated  pseudomembranes  
 Location:  diffuse  patchy  localised \_\_\_\_\_  
 Severity:  mild  moderate  severe

**Focal abnormalities**  Hemorrhoids [Golinger Classification:  grade 1  spontaneous red,  digital red,  non reducible]  
 Please specify for any focal abnormality  Vascular lesions  Angiectasia  Varices  
 Lesions / Polyps Size (mm) \_\_\_\_\_  
 Paris:  Ip  Sp  Is  Ia  Ib  Ic  III Any specification \_\_\_\_\_  
 Aspect:  malignant  adenomatous  hyperplastic  inflammatory  pseudopolyp  
 other (neuroendocrine, condylomas etc.) \_\_\_\_\_  
 Erosions / Ulcers Size (mm) \_\_\_\_\_  
 Depth:  superficial  cratered  
 Shape:  round  linear  irregular

Anal fissure  Fistula  Scar  Diverticula

---

**Biopsies**  none  yes  
 Location \_\_\_\_\_ Histological Diagnosis \_\_\_\_\_  
 Location \_\_\_\_\_ Histological Diagnosis \_\_\_\_\_  
 Location \_\_\_\_\_ Histological Diagnosis \_\_\_\_\_

---

**Follow-up**  Deceased  Dismissed  Still admitted Date \_\_\_/\_\_\_/\_\_\_

## Supplementary Statement 2: Variables

The following variables were recorded:

- 1) patients' characteristics [age, sex, American Society of Anaesthesiologists (ASA) classification of pre-admission physical status<sup>2</sup>]
- 2) previous medical history [comorbidities as reported by the referring endoscopist; relevant chronic therapy; specific assessment of antiplatelet and anticoagulation at admission]
- 3) COVID-19-related variables [date of symptoms onset; date of positive or negative PCR; admission regimen (Intensive Care Units (ICU), non-intensive Units (NIU), not admitted (Outpatient)); pharmacologic treatments during admission (antiviral therapy, antibiotics or antifungals, biologic therapy, hydroxychloroquine, steroids and anticoagulation)<sup>3</sup>]
- 4) D-Dimer values (ng/mL D-Dimer Units) and Platelet count ( $\times 10^9/L$ ) within 48 hours before procedure as possible biochemical markers of intravascular disseminated coagulation<sup>4</sup> (platelet count of patients with known liver cirrhosis was neglected)
- 5) Patients-reported GI symptoms [diarrhoea, vomiting, nausea, abdominal pain, anorexia]<sup>5</sup> unrelated to previous or concomitant conditions [symptoms of patients admitted for COVID-19-unrelated abdominal diseases (e.g. acute pancreatitis, cholangitis) were neglected];
- 6) endoscopy-related variables [urgent or not; indication (Upper GI (UGI) bleeding, Lower GI (LGI) bleeding, Symptoms, Placement of devices for nutritional support (e.g. percutaneous Gastrostomy or Naso-Duodenal tube)); timing of endoscopic examination with respect to SARS-CoV-2 onset (Onset-to-Endoscopy time) and the day of hospital admission (Admission-to-Endoscopy time)];
- 7) endoscopy findings recorded according with the Minimal Standard Terminology (MST) for Gastrointestinal Endoscopy published by the World Endoscopy Organization<sup>6</sup> (see **Supplementary Figure 1**);
- 8) Histopathology, when biopsies were taken as clinically indicated

## 9) Overall mortality

**References**

1. Laboratory testing for 2019 novel coronavirus (2019-nCoV) in suspected human cases <https://www.who.int/publications-detail/laboratory-testing-for-2019-novel-coronavirus-in-suspected-human-cases-20200117> (accessed 26 April 2020).
2. ASA Physical Status Classification System | American Society of Anesthesiologists (ASA) <https://www.asahq.org/standards-and-guidelines/asa-physical-status-classification-system> (accessed 9 May 2020).
3. Jean SS, Lee PI, Hsueh PR. Treatment options for COVID-19: The reality and challenges. *Journal of Microbiology, Immunology and Infection*. Epub ahead of print 2020. DOI: 10.1016/j.jmii.2020.03.034.
4. Giannis D, Ziogas IA, Gianni P. Coagulation disorders in coronavirus infected patients: COVID-19, SARS-CoV-1, MERS-CoV and lessons from the past. *J Clin Virol* 2020; 127: 104362.
5. Cheung KS, Hung IF, Chan PP, et al. Gastrointestinal Manifestations of SARS-CoV-2 Infection and Virus Load in Fecal Samples from the Hong Kong Cohort and Systematic Review and Meta-analysis. *Gastroenterology*. Epub ahead of print April 2020. DOI: 10.1053/j.gastro.2020.03.065.
6. Minimal Standard Terminology | World Endoscopy Organization (WEO) <http://www.worldendo.org/resources/minimal-standard-terminology-mst/> (accessed 3 April 2020).

**Supplementary Table 2: Classification of endoscopic abnormalities**

| Chronic                                              | Acute on Chronic abnormalities          | Minor abnormalities             | Major abnormalities          |
|------------------------------------------------------|-----------------------------------------|---------------------------------|------------------------------|
| Barrett Esophagus                                    | Any bleeding from Chronic abnormalities | Erythematous/Edematous mucosa * | Esophagitis                  |
| Duodenal Scalloping                                  |                                         | Granular/Nodular mucosa         | Pseudomembranous colitis     |
| Colonic Melanosis                                    |                                         | Candidosis / Candidiasis        | Dieulafoy lesion             |
| Atrophic gastric mucosa                              |                                         |                                 | Erosions / Ulcers            |
| Angiectasia                                          |                                         |                                 | Mallory-Weiss tears          |
| Ectopic gastric mucosa                               |                                         |                                 | Petechial/Hemorrhagic mucosa |
| Flat/Elevated or Excavated lesions / Polyps / Tumors |                                         |                                 | Eroded/Ulcerated mucosa      |
| Esophageal varices                                   |                                         |                                 |                              |
| Thickened/Enlarged gastric folds                     |                                         |                                 |                              |
| Ectopic pancreas                                     |                                         |                                 |                              |
| Enlarged Brunners glands                             |                                         |                                 |                              |
| Hemorrhoids                                          |                                         |                                 |                              |
| Condylomas                                           |                                         |                                 |                              |

\* this category potentially includes aspecific minor abnormalities resulting from bowel cleansing regimens administered for lower GI tract endoscopies.

### Supplementary Statement 3: Categorization of variables

Variables included in univariate/multivariate analysis were categorized as follows:

1. SEX: Male / Female
2. Pre-admission ASA score: ASA1 / ASA2 / ASA3 / ASA4 / ASA5
3. Comorbidities:
  - a. Hypertension Yes / No
  - b. Diabetes Yes / No
  - c. Ischemic Cardiomyopathy Yes / No
  - d. Atrial Fibrillation Yes / No
  - e. Active Cancer Yes / No
  - f. Cirrhosis Yes / No
  - g. CKD Yes / No
  - h. COPD / Asthma Yes / No
  - i. Obesity Yes / No
4. Antiplatelet at admission: Yes / No
5. NSAIDS at admission: Yes / No
6. Anticoagulant at admission: Yes / No
7. GI symptoms:
  - a. Any Yes / No
  - b. Nausea Yes / No
  - c. Abdominal Pain Yes / No
  - d. Vomiting Yes / No
  - e. Diarrhoea Yes / No
  - f. Anorexia Yes / No
8. COVID respiratory disease: Yes / No
9. Hospital regimen: Intensive Care Unit (with invasive ventilation) / Sub-Intensive Care / Outpatient
10. Treatments during admission
  - a. Antibiotics / Antimicrobial Yes / No
  - b. Antiviral Yes / No
  - c. Hydroxychloroquine Yes / No
  - d. Biologic therapy Yes / No
  - e. Anticoagulation Yes / No
  - f. Steroids Yes / No

**Supplementary Table 3: Endoscopic procedures**

| Characteristic                                 | N = 114     |
|------------------------------------------------|-------------|
| Urgent, n (%)                                  | 76 (66.7%)  |
| Indication                                     |             |
| Bleeding                                       | 63 (55.3%)  |
| Upper GI Bleeding                              | 41 (36.3%)  |
| Lower GI Bleeding                              | 22 (19.5%)  |
| Other Symptoms                                 | 46 (40.6%)  |
| Placement of Nutritional Device                | 5 (4.4%)    |
| Exam                                           |             |
| Esophagogastroduodenoscopy                     | 71 (62.3%)  |
| Colonoscopy                                    | 27 (23.7%)  |
| ERCP                                           | 10 (8.8%)   |
| EUS                                            | 5 (4.4%)    |
| Enteroscopy                                    | 1 (0.9%)    |
| Median Onset-to-Endoscopy time, days [IQR]     | 13 [6-21]   |
| Within 7 days from clinical onset              | 37 (32.5%)  |
| After 7 days from onset                        | 77 (67.5%)  |
| Median Admission-to-Endoscopy time, days [IQR] | 10.5 [5-21] |
| At Admission                                   | 9 (7.9%)    |
| Within 7 days from admission                   | 37 (32.5%)  |
| After 7 days from admission                    | 68 (59.6%)  |
| Endoscopic Findings                            |             |
| Major                                          | 52 (45.6%)  |
| Acute on Chronic                               | 13 (11.4%)  |
| Minor                                          | 14 (12.3%)  |
| Chronic                                        | 4 (3.5%)    |
| Normal                                         | 31 (27.2%)  |



**Supplementary Table 4: Categories of endoscopic finding according to type and timing of endoscopy**

|                                                | Category of endoscopic finding |                  |                       | p-Value |
|------------------------------------------------|--------------------------------|------------------|-----------------------|---------|
|                                                | Major                          | Acute-on-Chronic | "Negative" procedures |         |
| <i>Type of Endoscopy</i>                       |                                |                  |                       |         |
| Upper                                          | 40 (46%)                       | 6 (6.9%)         | 41 (47.1%)            | 0.02    |
| Lower                                          | 12 (44.4%)                     | 7 (25.9%)        | 8 (29.6%)             |         |
| <i>Timing of Endoscopy</i>                     |                                |                  |                       |         |
| Median Onset-to-Endoscopy time, days [IQR]     | 13.5 [5.5-21]                  |                  | 15 [8.8-24.3]         | 0.2     |
| Within 7 days from onset                       | 19 (36.5%)                     |                  | 9 (18.4%)             | 0.04    |
| Median Admission-to-Endoscopy time, days [IQR] | 11 [5-21]                      |                  | 13 [5.3-23.8]         | 0.4     |
| At admission                                   | 4 (7.7%)                       |                  | 3 (6.1%)              | 0.7     |
| Within 7 days from admission                   | 18 (34.6%)                     |                  | 14 (28.6%)            |         |

### Supplementary Figure 2:

Receiver Operating Characteristics Curve analysis of D-Dimers values distribution (ng/ml DDU) and their ability to discriminate between patients with Major abnormalities and patients with Minor, Chronic or no abnormalities. In the ROC curve, the true positive rate (sensitivity) is plotted in function of the false positive rate (100-Specificity) for different cut-off points of D-Dimers distribution. Each point on the ROC plot represents a sensitivity/specificity pair corresponding to a particular D-Dimers threshold. The best identified criterion was D-Dimer > 1850 ng/ml DDU.

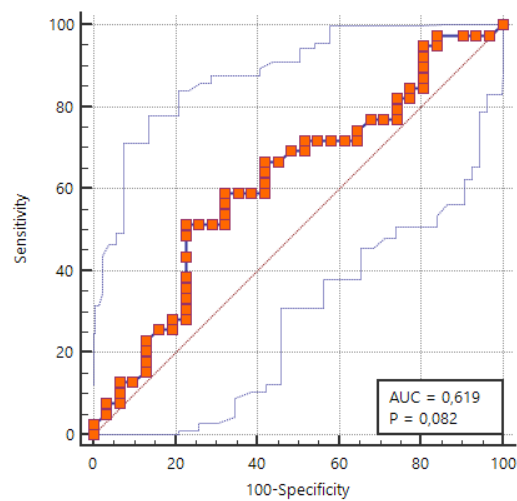

D-Dimer > 1850 ng/ml DDU

### Supplementary Table 5: Comparison between patients with Major abnormalities and Acute-on-Chronic findings

| Characteristics                                | Major abnormalities<br>N=52 | Acute-on-Chronic findings<br>N=12 | p-Value |
|------------------------------------------------|-----------------------------|-----------------------------------|---------|
| Male sex, n (%)                                | 42 (80.8%)                  | 8 (61.5%)                         | 0.1     |
| Median Age, years [IQR]                        | 71 [62.5-79]                | 72 [56.3-73.8]                    | 0.4     |
| Age dico                                       | 19 (36.5%)                  |                                   |         |
| Pre-admission ASA score, n (%)                 |                             |                                   | 0.1     |
| ASA 1                                          | 6 (11.5%)                   | 0                                 |         |
| ASA 2                                          | 20 (38.5%)                  | 2 (15.4%)                         |         |
| ASA 3                                          | 24 (46.2%)                  | 10 (76.9%)                        |         |
| ASA 4                                          | 2 (3.8%)                    | 1 (7.7%)                          |         |
| Comorbidities                                  |                             |                                   |         |
| Hypertension, n (%)                            | 30 (57.7%)                  | 6 (46.2%)                         | 0.5     |
| Diabetes, n (%)                                | 8 (15.4%)                   | 4 (30.8%)                         | 0.2     |
| Ischemic Cardiomyopathy, n (%)                 | 7 (13.5%)                   | 3 (23.1%)                         | 0.4     |
| Atrial Fibrillation, n (%)                     | 2 (3.8%)                    | 2 (15.4%)                         | 0.1     |
| Active Cancer, n (%)                           | 3 (5.8%)                    | 1 (7.7%)                          | 0.8     |
| Cirrhosis                                      | 2 (3.9%)                    | 4 (30.8%)                         | 0.003   |
| CKD                                            | 10 (19.2%)                  | 1 (7.7%)                          | 0.3     |
| COPD / Asthma                                  | 7 (13.5%)                   | 1 (7.7%)                          | 0.6     |
| Obesity                                        | 7 (13.5%)                   | 1 (7.7%)                          | 0.6     |
| Antiplatelet                                   |                             |                                   |         |
| Anticoagulant                                  |                             |                                   |         |
| Median D-Dimer, ng/ml DDU [IQR]                | 2149 [567.8-3522.5]         | 2825 [1180-9829.5]                | 0.3     |
| D-Dimer > 1850 ng/ml DDU                       | 18 (48.6%)                  | 5 (62.5%)                         | 0.5     |
| Median Onset-to-Endoscopy time, days [IQR]     | 13.5 [5.5-21]               | 5 [0.8-10.3]                      | 0.02    |
| Early Onset                                    | 19 (36.5%)                  | 9 (69.2%)                         | 0.04    |
| Median Admission-to-Endoscopy time, days [IQR] | 11 [5-21]                   | 6 [1.8-9.8]                       | 0.2     |
| Symptoms, n (%)                                |                             |                                   |         |
| None                                           | 23 (46.9%)                  | 6 (66.7%)                         | 0.3     |
| Nausea                                         | 9 (18.4%)                   | 2 (22.2%)                         | 0.8     |
| Abdominal pain                                 | 17 (34.7%)                  | 2 (22.2%)                         | 0.5     |
| Vomiting                                       | 9 (18.4%)                   | 1 (11.1%)                         | 0.6     |
| Diarrhea                                       | 10 (20.4%)                  | 1 (11.1%)                         | 0.5     |
| Anorexia                                       | 7 (14%)                     | 0                                 | 0.2     |
| COVID Respiratory Disease                      | 42 (80.8%)                  | 10 (76.9%)                        | 0.8     |
| Hospital Regimen                               |                             |                                   | 0.8     |
| Intensive Care Unit, n (%)                     | 18 (34.6%)                  | 4 (30.8%)                         |         |
| Sub-intensive Care, n (%)                      | 34 (65.4%)                  | 9 (69.2%)                         |         |
| Treatments during admission                    |                             |                                   |         |
| Antibiotics / Antimicrobial                    | 42/49 (85.7%)               | 11/12 (91.7%)                     | 0.6     |
| Antiviral                                      | 26/47 (55.3%)               | 5/12 (41.7%)                      | 0.4     |
| Hydroxychloroquine                             | 20/48 (41.7%)               | 6/12 (50%)                        | 0.6     |
| Biologic therapy                               | 11/46 (23.9%)               | 2/12 (16.7%)                      | 0.6     |
| Anticoagulation                                | 23/39 (59%)                 | 4/10 (40%)                        | 0.3     |
| Steroids                                       | 13/49 (26.5%)               | 4/12 (27.3%)                      | 0.6     |

**Supplementary Table 6: Multivariate Logistic Regression**

| Variable                                                 | Odds Ratio *              | p-Value |
|----------------------------------------------------------|---------------------------|---------|
| Atrial Fibrillation<br>Absent<br>• Present               | 1<br>• 0.22 [0.02-3.05]   | 0.259   |
| D-Dimers value<br>≤ 1850 ng/ml DDU<br>• > 1850 ng/ml DDU | 1<br>• 12.12 [1.69-86.87] | 0.013   |
| GI symptoms<br>Absent<br>• Present                       | 1<br>• 6.17 [1.13-33.67]  | 0.035   |
| Biologic Therapy<br>No<br>• Yes                          | 1<br>• 0.86 [0.09-7.91]   | 0.892   |
| Antiviral Therapy<br>No<br>• Yes                         | 1<br>• 0.23 [0.04-1.22]   | 0.083   |

\* adjusted for age, sex, pre-admission ASA score
